# Supplementary figures and images for: Integrative miRNA–mRNA functional analysis identifies miR-182 as a potential prognostic biomarker in breast cancer
Source: Royal Society of Chemistry journal article supplement (doi:10.1039/d0mo00160k), 2021-04-22

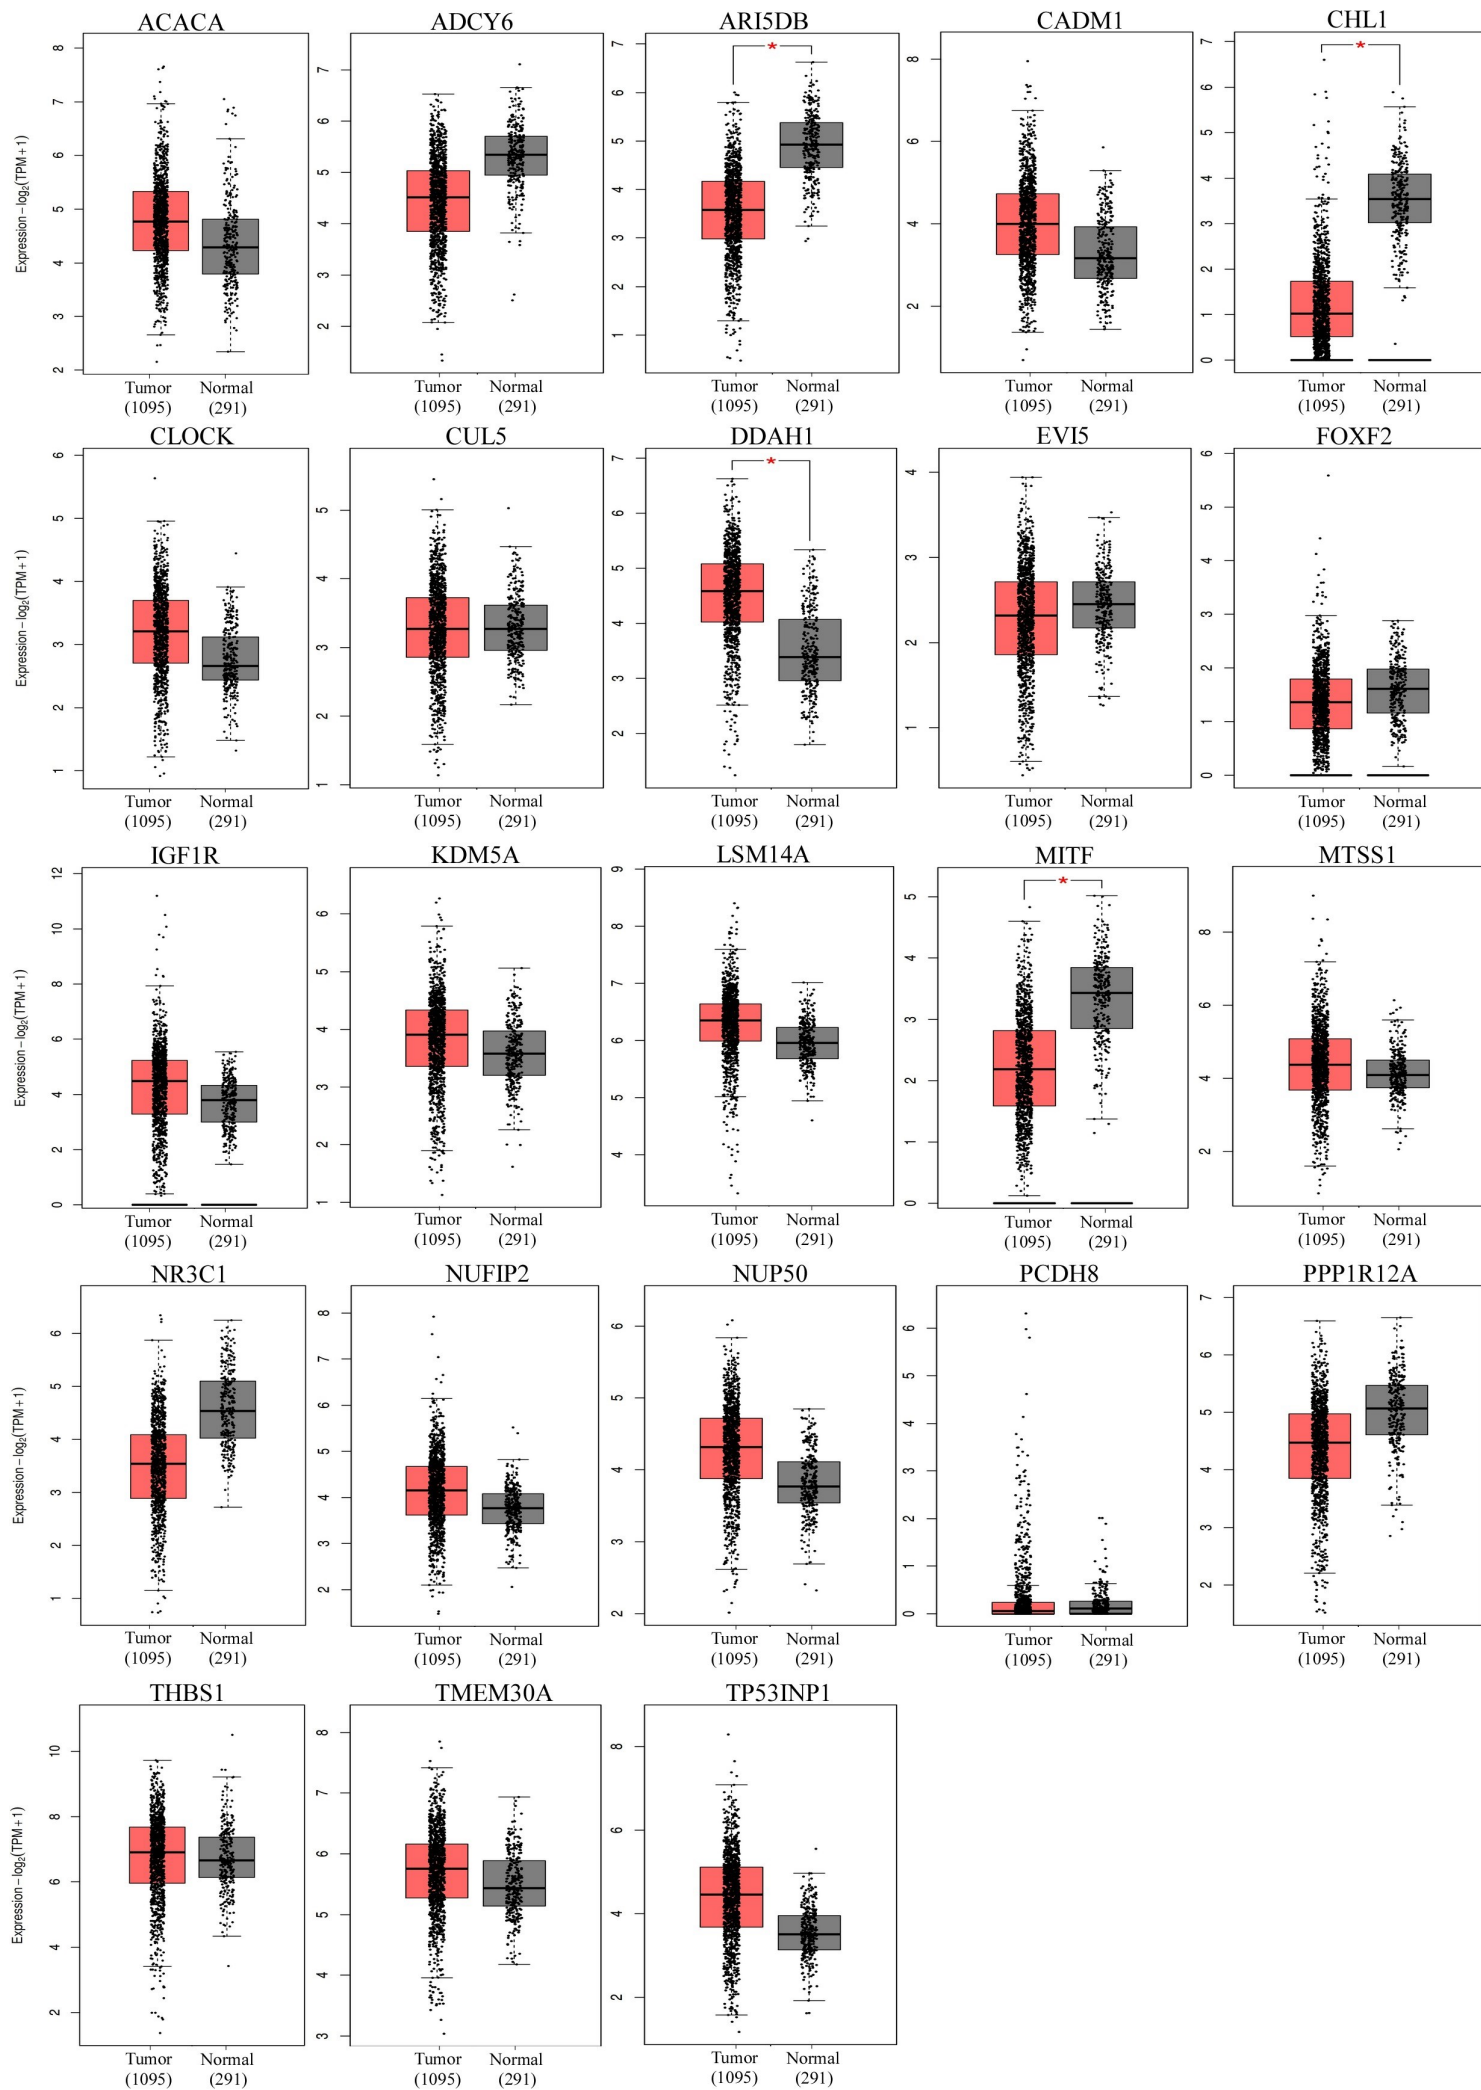

Supplement: d0mo00160k1.pdf [file d0mo00160k1.pdf]
